# Supplementary material for: Highly sensitive and selective coumarin probe for hydrogen sulfide imaging in living cells
Source: Royal Society of Chemistry journal article supplement (doi:10.1039/c5ay01624j), 2015-01-01
Supplement: c5ay01624j1.pdf [file c5ay01624j1.pdf]

## Electronic Supplementary Information

# Highly sensitive and selective coumarin probe for hydrogen sulfide imaging in living cells

Sheng Chen,<sup>a</sup> Chao Ma,<sup>b</sup> Dong-En Wang,<sup>a</sup> Xiang Han,<sup>a</sup> Longlong Zhang,<sup>a</sup> and Jinyi Wang<sup>\*a,b</sup>

<sup>a</sup> *College of Science, Northwest A&F University, Yangling, Shaanxi 712100, P. R. China*

<sup>b</sup> *College of Veterinary Medicine, Northwest A&F University, Yangling, Shaanxi 712100, P. R. China*

**Abstract.** This Supplementary data include all of the additional information as noted in the manuscript.

# **S1. $^1\text{H}$ , $^{13}\text{C}$ NMR and Mass Spectra of DNPOCA**

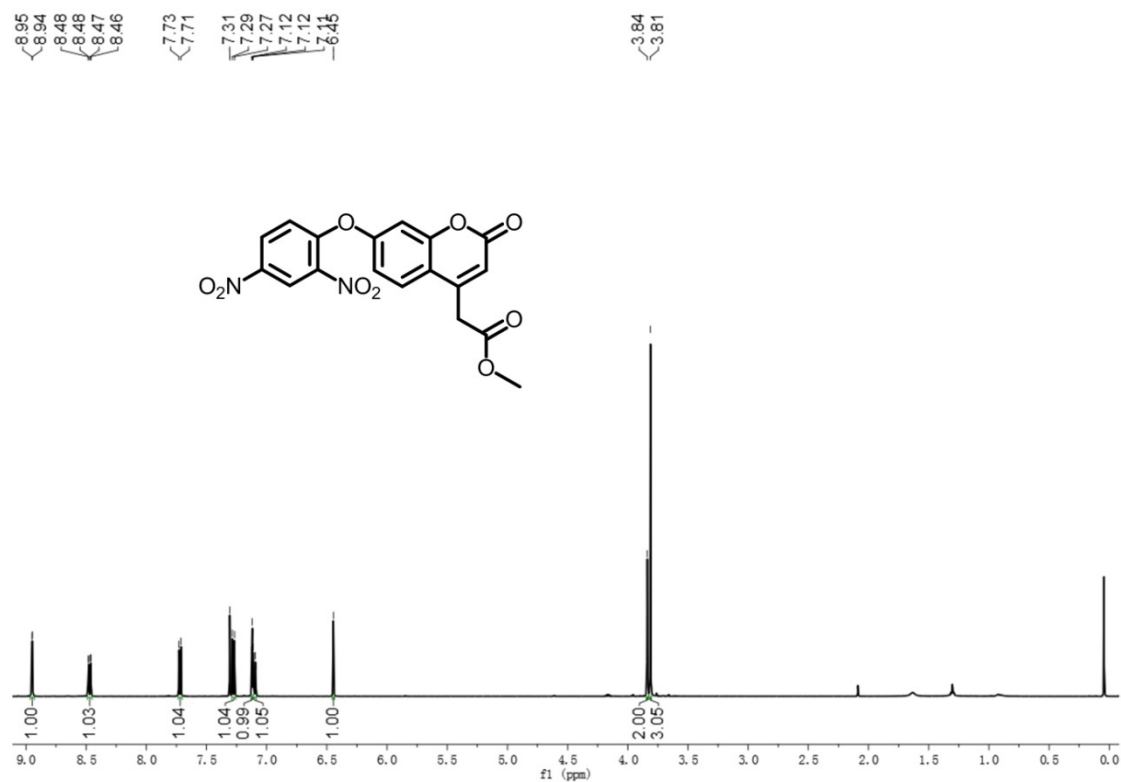

**Figure S1.**  $^1\text{H}$  NMR spectrum of DNPOCA in  $\text{CDCl}_3$ .

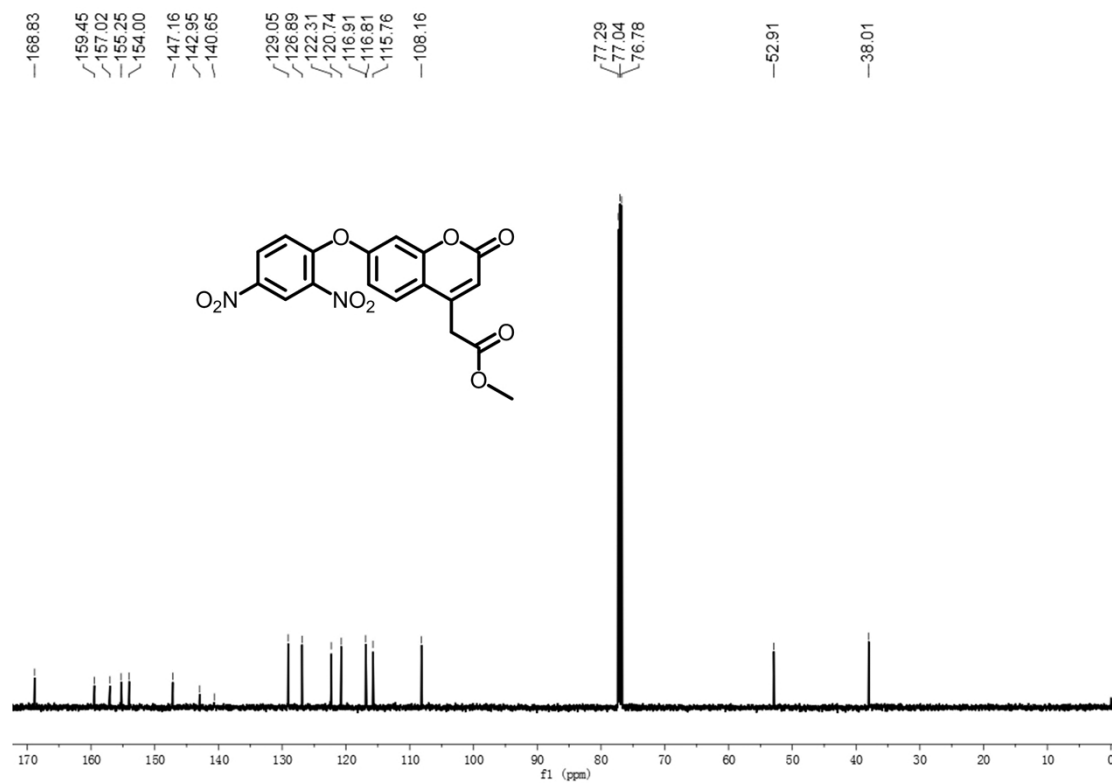

**Figure S2.**  $^{13}\text{C}$  NMR spectrum of DNPOCA in  $\text{CDCl}_3$ .

[WJY]-CS-P-1 #75-80 RT: 0.66-0.72 AV: 6 NL: 3.46E2  
T: ITMS - c ESI Full ms [50.00-1000.00]

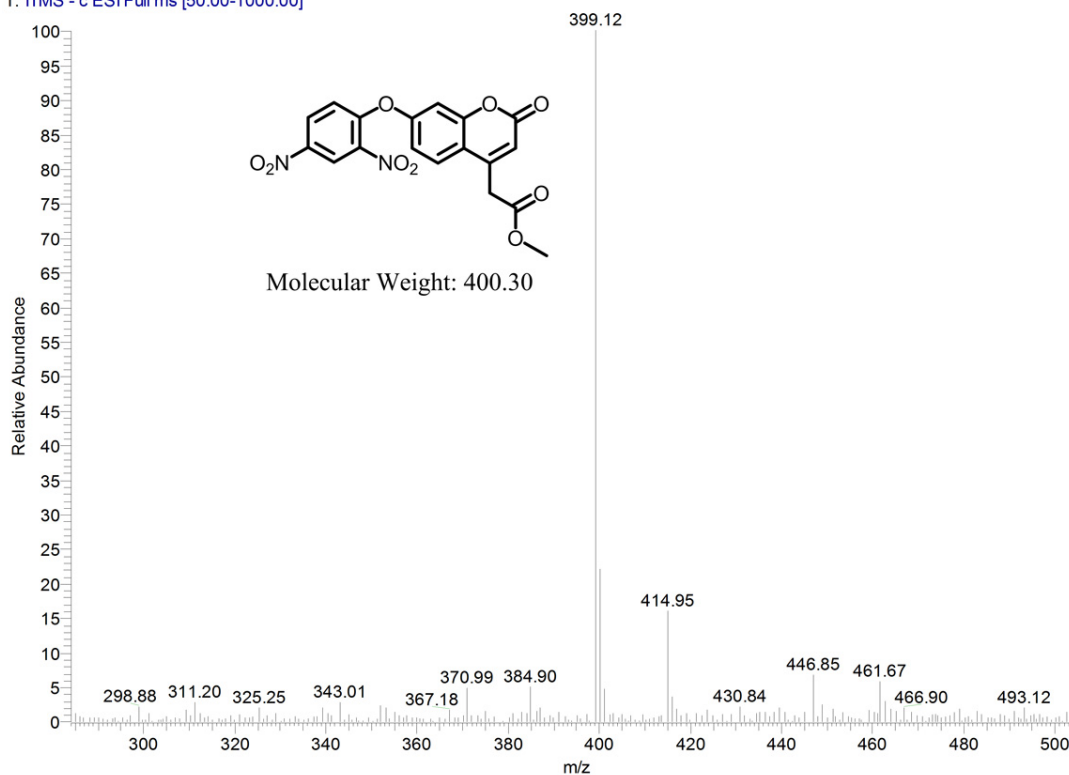

**Figure S3.** ESI-MS of DNPOCA

## **S2. The acquisition and analysis of thiolysis product of DNPOCA after incubated with Na<sub>2</sub>S**

DNPOCA (20 mg, 0.05 mmol) was dissolved in CH<sub>3</sub>CN (10 mL), followed by the addition of Na<sub>2</sub>S•9H<sub>2</sub>O (199.35 mg, 0.83 mmol). The resultant mixture was stirred for 5 hours at room temperature. Subsequently, the solvent was evaporated. The fluorescent product was purified by column chromatography and analyzed by mass spectrometry.

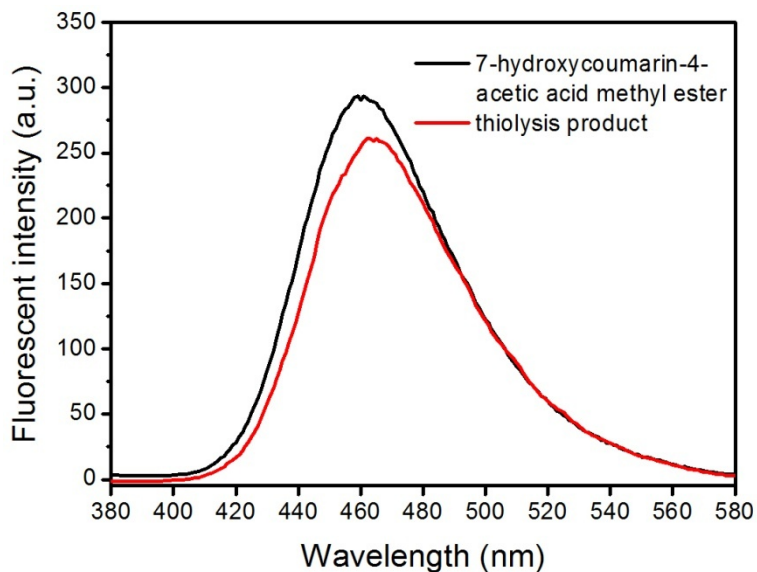

**Figure S4.** Fluorescence spectra of 7-hydroxycoumarin-4-acetic acid methyl ester and thiolysis product in aqueous solution (20 mM, pH = 7.4, CH<sub>3</sub>CN/PBS = 1:9, 3 mM CTAB) at room temperature.

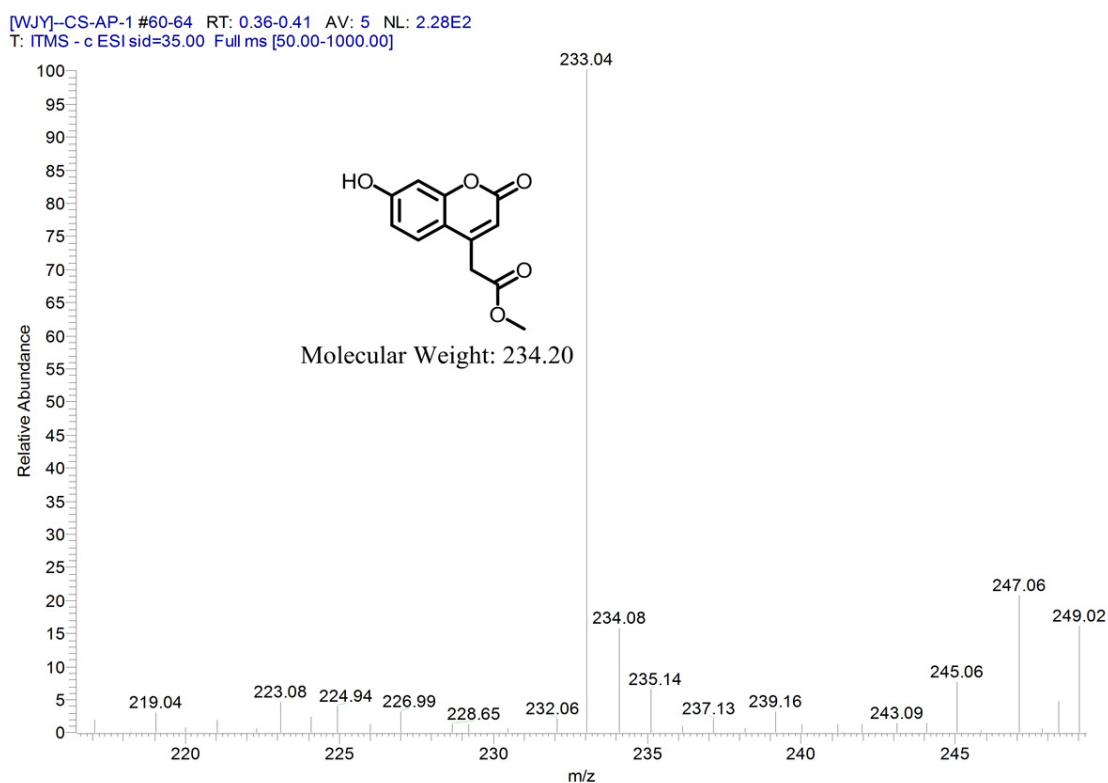

**Figure S5.** ESI-MS confirmed the formation of 7-hydroxycoumarin-4-acetic acid methyl ester in the reaction of DNPOCA with Na<sub>2</sub>S.

### S3. Study on the reaction kinetics of DNPOCA

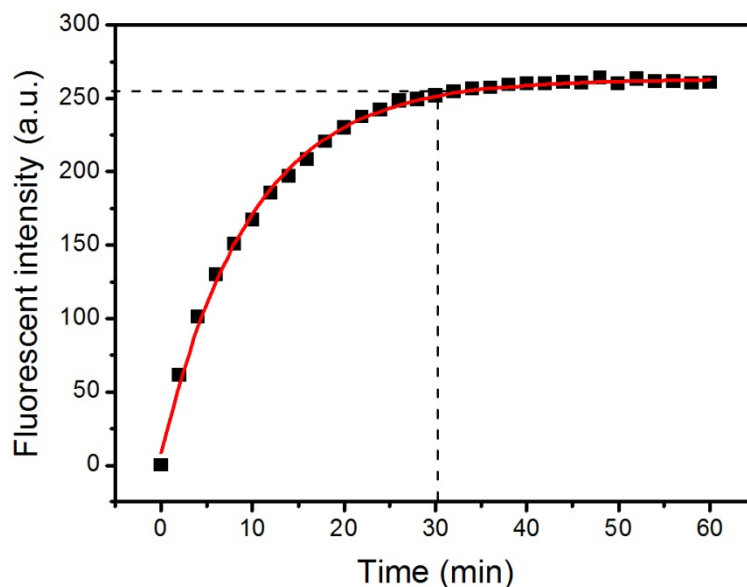

**Figure S6.** Time-dependent fluorescence intensity changes at 463 nm of the probe DNPOCA (5.0  $\mu\text{M}$ ) in the absence of  $\text{Na}_2\text{S}$  (100  $\mu\text{M}$ ) in aqueous solution (20 mM, pH = 7.4,  $\text{CH}_3\text{CN}/\text{PBS}$  = 1:9, 3 mM CTAB) at room temperature.

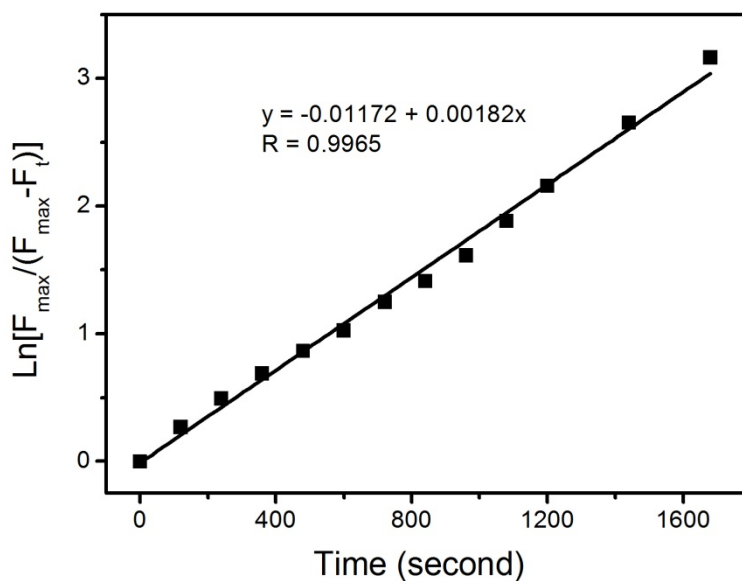

**Figure S7.** The pseudo-first-order kinetic plot of the reaction of the probe DNPOCA (5.0  $\mu\text{M}$ ) with  $\text{Na}_2\text{S}$  (100  $\mu\text{M}$ ) in aqueous solution (20 mM, pH = 7.4,  $\text{CH}_3\text{CN}/\text{PBS}$  = 1:9, 3 mM CTAB) at room temperature.

#### S4. The calculation method for the detection limit.

The limit of detection (LOD) for DNPOCA was calculated based on the fluorescence titration. To determine the S/N ratio, the fluorescence emission intensity of DNPOCA without Na<sub>2</sub>S was measured by 10 times and the standard deviation of blank measurements was determined. Then, the solution was treated with Na<sub>2</sub>S from 0 to 100 μM. A linear regression curve was then achieved according to the fluorescence emission intensity in the range of Na<sub>2</sub>S from 0 to 20 μM. The detection limit was calculated with the equation (Eq. 1) at S/N=3, in which  $\sigma$  is the standard deviation of the background and  $s$  is the sensitivity.

$$LOD = 3 \times \frac{\sigma}{S} \quad (\text{Eq. 1})$$

**Table S1. Comparison of fluorescent probes for hydrogen sulfide**

| Probe                                                                               | $\lambda_{\text{ex}}/\lambda_{\text{em}}$<br>(nm) | Detection<br>medium            | Detection<br>limit | Ref. |
|-------------------------------------------------------------------------------------|---------------------------------------------------|--------------------------------|--------------------|------|
| 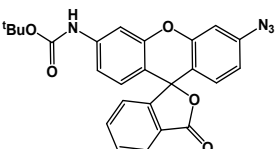 | 490/525                                           | HEPES (pH 7.4),<br>0.2% DMF    | 5-10 μM            | 1    |
|  | 340/535                                           | PBS (pH 7.4),<br>0.5% Tween-20 | 1 μM               | 2    |
|  | 360/480                                           | HEPES (pH 7.4),<br>80% DMF     | 0.1 μM             | 3    |

|                                                                                     |                    |                                           |         |    |
|-------------------------------------------------------------------------------------|--------------------|-------------------------------------------|---------|----|
| 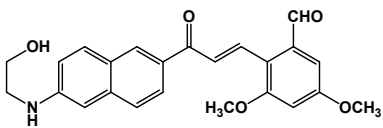   | 360/480            | HEPES (pH 7.4),<br>1% CH <sub>3</sub> CN  | 50 nM   | 4  |
|    | 465/510            | PBS (pH7.0),<br>1% DMSO                   | 5 μM    | 5  |
|    | 475/510<br>475/652 | PBS (pH7.4),<br>2% DMSO                   | 1 μM    | 6  |
|    | 450/485<br>475/690 | PBS (pH7.4),<br>30% CH <sub>3</sub> CN    | 0.14 μM | 7  |
|  | 465/515            | PBS (pH 7.4),<br>10% CH <sub>3</sub> CN   | 1-10 μM | 8  |
|  | 455/517            | PBS (pH 7.4),<br>20% CTAB                 | 0.1 μM  | 9  |
|  | 650/708            | PBS (pH 7.0),<br>20% ethanol,<br>3mM CTAB | 0.1 μM  | 10 |
|  | 520/670            | PBS (pH 7.4),<br>50% DMSO                 | 3.05 μM | 11 |

|                                                                                   |         |                                                     |         |           |
|-----------------------------------------------------------------------------------|---------|-----------------------------------------------------|---------|-----------|
| 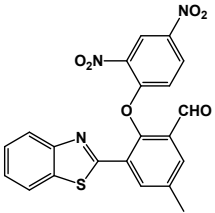 | 440/545 | PBS (pH 7.4),<br>25% CH <sub>3</sub> CN             | 48 nM   | 12        |
|  | 450/555 | PBS (pH 7.4),<br>10% CH <sub>3</sub> CN             | 0.48 μM | 13        |
|  | 365/463 | PBS (pH 7.4),<br>10% CH <sub>3</sub> CN<br>3mM CTAB | 49.7 nM | This work |

#### S5. Study on the sensitivity of DNPOCA by UV-visible absorption spectra.

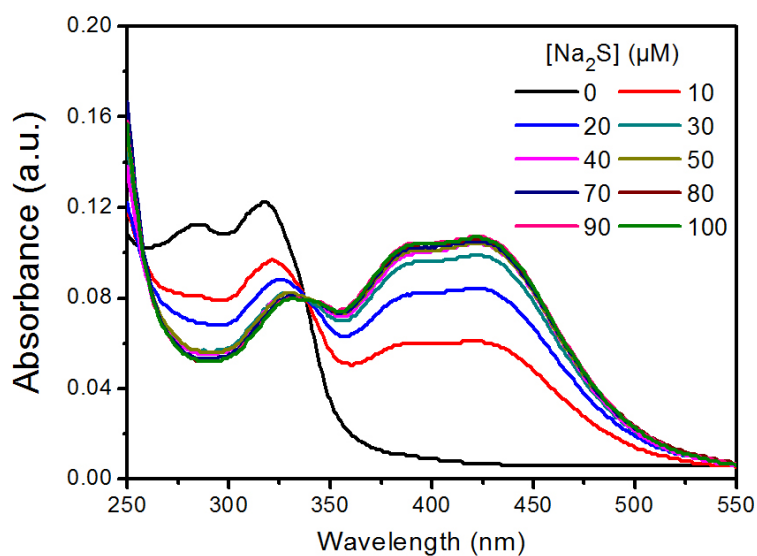

**Figure S8.** UV-vis absorption spectra changes of the probe DNPOCA (5.0 μM) in the presence of Na<sub>2</sub>S (0-20 equiv.) in aqueous solution (20 mM, pH = 7.4, CH<sub>3</sub>CN/PBS = 1:9, 3 mM CTAB) at room temperature.



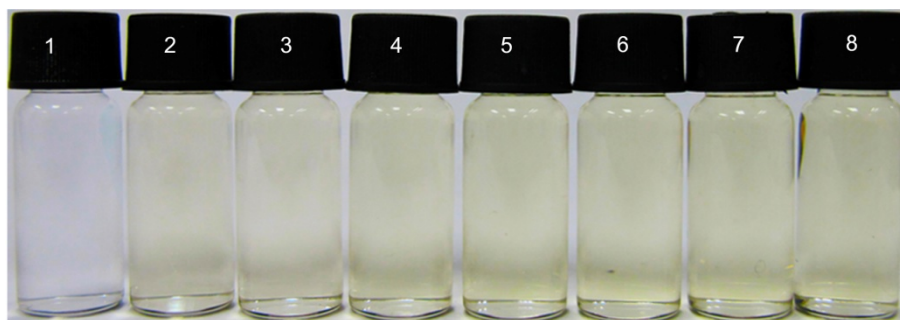

**Figure S9.** Color changes of the probe DNPOCA (5.0  $\mu\text{M}$ ) with different concentrations of  $\text{Na}_2\text{S}$  for 40 min at room temperature (From 1 to 8: 0, 10, 30, 50, 70, 80, 90, 100  $\mu\text{M}$   $\text{Na}_2\text{S}$ , respectively).

#### S6. Study on the selectivity of DNPOCA for $\text{H}_2\text{S}$

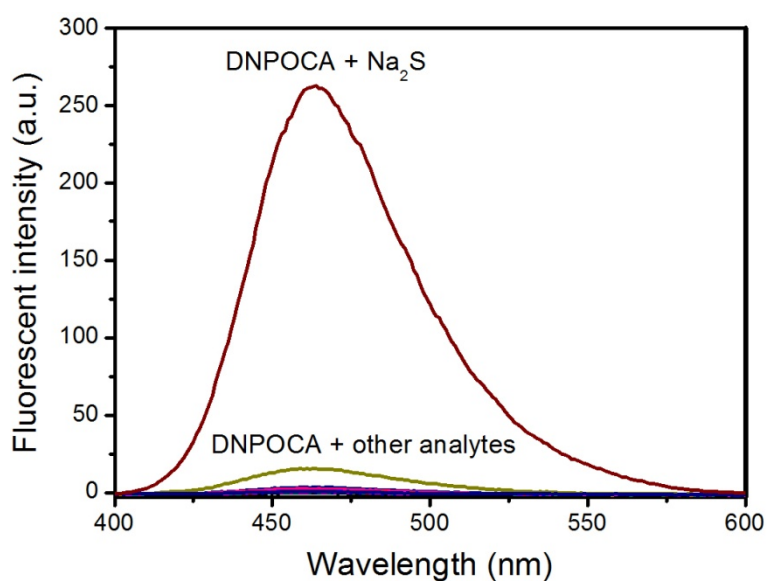

**Figure S10.** Fluorescent spectra changes of the probe DNPOCA (5.0  $\mu\text{M}$ ) in the presence of various species (20 equiv.) in aqueous solution (20 mM, pH = 7.4,  $\text{CH}_3\text{CN}/\text{PBS}$  = 1:9, 3 mM CTAB) at room temperature.

### S7. Effect of pH for H<sub>2</sub>S detection

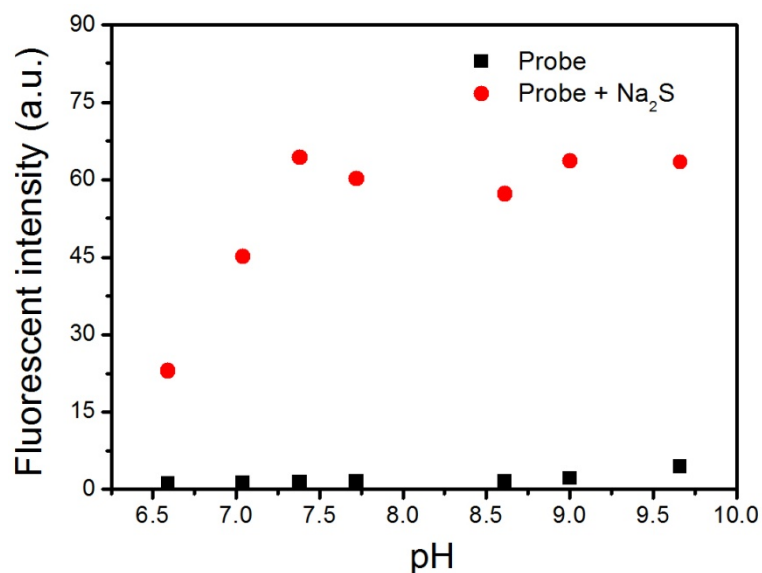

**Figure S11.** Fluorescence intensity changes of the probe DNPOCA (5 μM) at different pH values in the absence (■) or presence (●) of Na<sub>2</sub>S (100 μM) in aqueous solution (20 mM, CH<sub>3</sub>CN/PBS = 1:9, 3 mM CTAB) at room temperature.  $\lambda_{\text{ex}} = 365$  nm,  $d_{\text{ex}} = 1.5$ ,  $d_{\text{em}} = 3$  nm.

### S8. Cytotoxicity assay

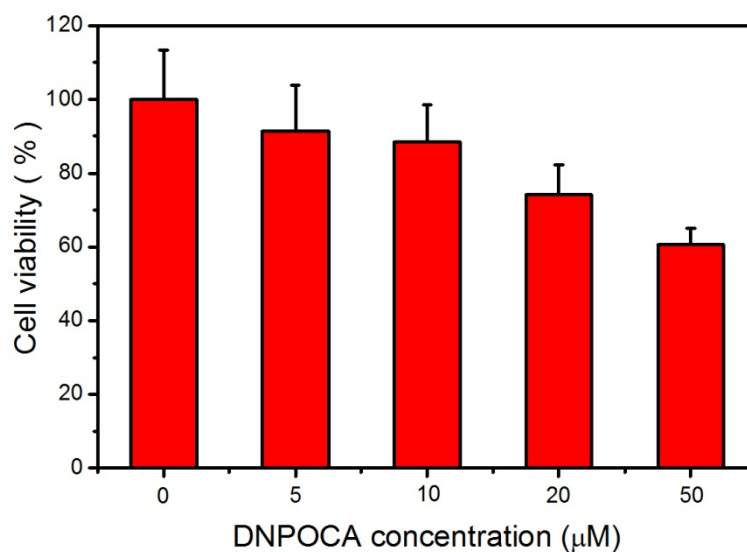

**Figure S12.** Cytotoxicity assay of the probe DNPOCA for HepG2 cells after 24-h culture.

## References

1. A. R. Lippert, E. J. New and C. J. Chang, *J. Am. Chem. Soc.*, 2011, **133**, 10078.
2. H. Peng, Y. Cheng, C. Dai, A. L. King, B. L. Predmore, D. J. Lefer and B. Wang, *Angew. Chem. Int. Ed.*, 2011, **50**, 9672.
3. G. J. Mao, T. T. Wei, X. X. Wang, S. Y. Huan, D. Q. Lu, J. Zhang, X. B. Zhang, W. Tan, G. L. Shen and R. Q. Yu, *Anal. Chem.* 2013, **85**, 7875-7881.
4. S. Singha, D. Kim, H. Moon, T. Wang, K. H. Kim, Y. H. Shin, J. Jung, E. Seo, S. J. Lee and K. H. Ahn, *Anal. Chem.* 2014, **87**, 1188-1195.
5. Y. Qian, J. Karpus, O. Kabil, S. Y. Zhang, H. L. Zhu, R. Banerjee, J. Zhao and C. He, *Nat. Commun.* 2011, **2**, 495.
6. Y. Chen, C. Zhu, Z. Yang, J. Chen, Y. He, Y. Jiao, W. He, L. Qiu, J. Cen and J. Z. Guo, *Angew. Chem. Int. Ed.* 2013, **52**, 1688–1691
7. J. Liu, Y. Q. Sun, J. Zhang, T. Yang, J. Cao, L. Zhang and W. Guo, *Chem.-Eur. J.* 2013, **19**, 4717-4722.
8. C. Liu, J. Pan, S. Li, Y. Zhao, L. Y. Wu, C. E. Berkman, A. R. Whorton and M. Xian, *Angew. Chem. Int. Ed.* 2011, **123**, 10511-10513.
9. J. Zhang, Y. Q. Sun, J. Liu, Y. Shi and W. Guo, *Chem. Commun.*, 2013, **49**, 11305-11307
10. X. Cao, W. Lin, K. Zheng and L. He, *Chem. Commun.*, 2012, **48**, 10529.
11. W. Sun, J. Fan, C. Hu, J. Cao, H. Zhang, X. Xiong, J. Wang, S. Cui, S. Sun and X. Peng, *Chem. Commun.* 2013, **49**, 3890-3892.
12. Z. Huang, S. Ding, D. Yu, F. Huang and G. Feng, *Chem. Commun.* 2014, **50**, 9185-9187
13. T. Liu, Z. Xu, D. R. Spring and J. Cui, *Org. Lett.* 2013, **15**, 2310-2313.
